# Supplementary material
Source: PubMed Central journal article supplement (PMC4870650)
Supplement: Supp_Figure1.pdf [file Supp_Figure1.pdf]

## Supplementary Data

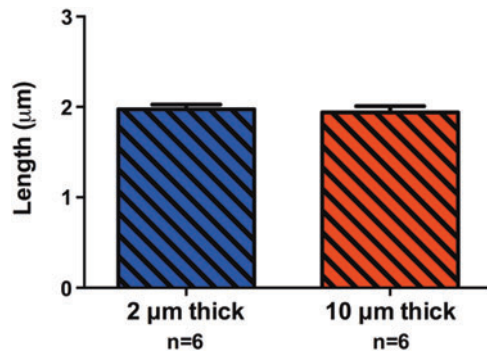

**SUPPLEMENTARY FIG. S1.** Evaluation of sarcomeric length of Neonatal rat ventricular myocytes (NRVM) on 2 μm and 10 μm-thick patterned Parylene C films; *n* represents the number of areas out of two constructs.
