# Supplementary material
Source: PubMed Central journal article supplement (PMC4870650)
Supplement: Supp_Figure2.pdf [file Supp_Figure2.pdf]

### 0.5 Hz Field Stimulation

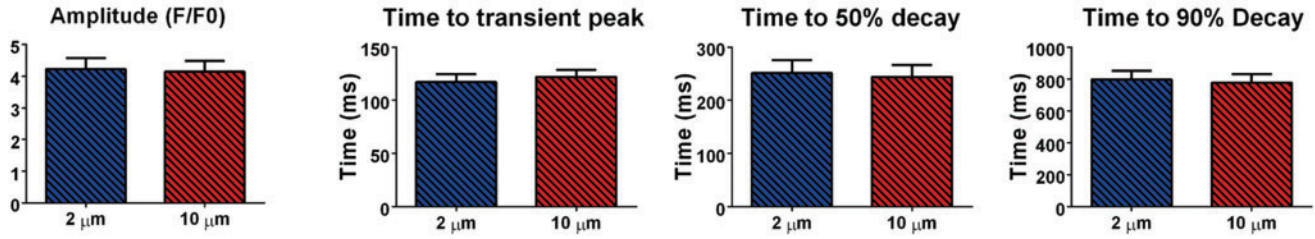

### 1 Hz Field Stimulation

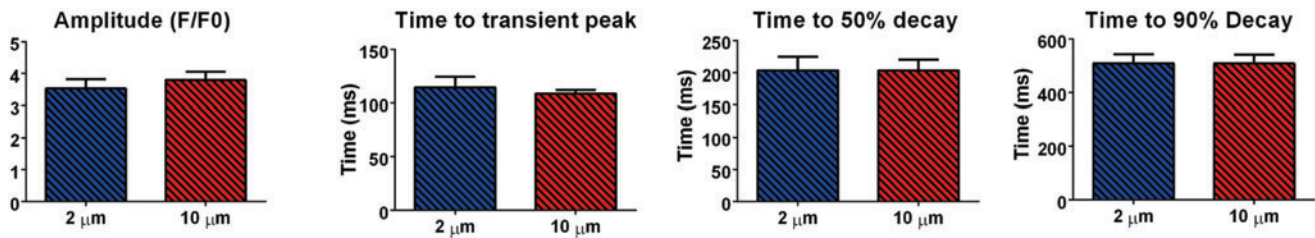

### 2 Hz Field Stimulation

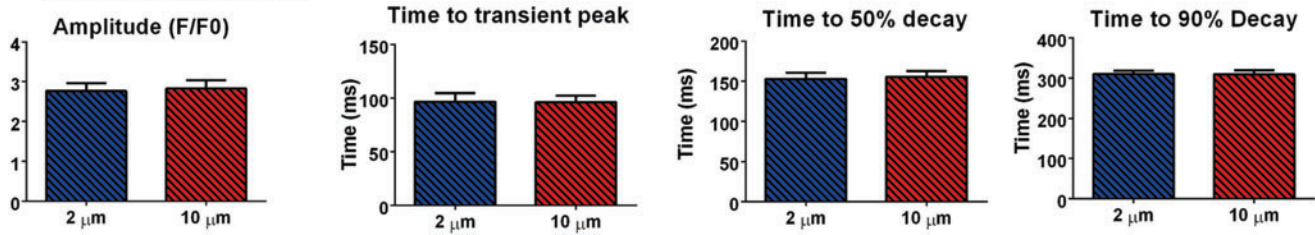

**SUPPLEMENTARY FIG. S2.**  $\text{Ca}^{2+}$  transient data from NRVM cultured on 2 and 10 μm-thick micropatterned Parylene C constructs. Error bars indicate standard error of mean. Data derived from  $n = 13$  constructs and seven isolations.
