# Supplementary material
Source: PubMed Central journal article supplement (PMC4870650)
Supplement: Supp_Figure3.pdf [file Supp_Figure3.pdf]

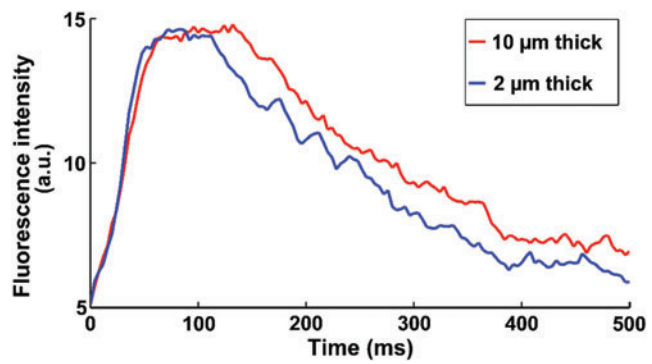

**SUPPLEMENTARY FIG. S3.** Representative  $\text{Ca}^{2+}$  transients from NRVM cultured on 2 (*blue*) and 10  $\mu\text{m}$ -thick (*red*) micropatterned Parylene C constructs.
