# Supplementary material
Source: PubMed Central journal article supplement (PMC4870650)
Supplement: Supp_Figure4.pdf [file Supp_Figure4.pdf]

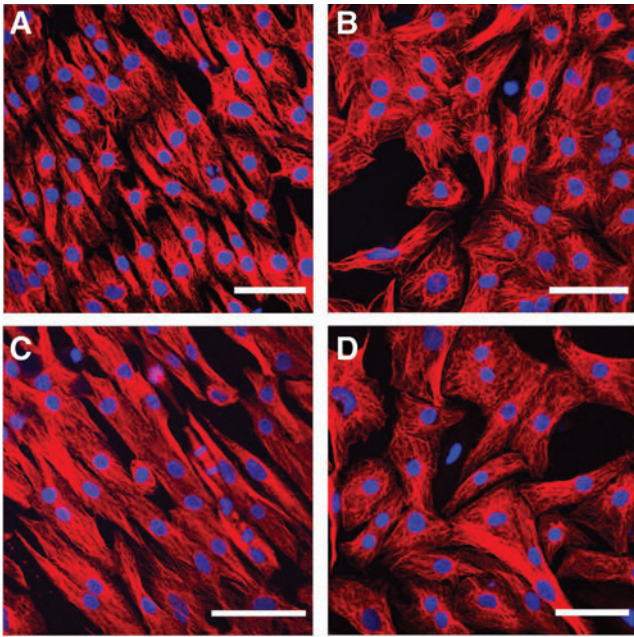

**SUPPLEMENTARY FIG. S4.** Immunofluorescence images of microtubules in NRVM cultured on (A, B) 2  $\mu\text{m}$ -thick and (C, D) 10  $\mu\text{m}$ -thick Parylene C constructs (left) patterned and (right) unpatterned. *Red*, mouse anti  $\alpha$ -tubulin antibody. *Blue*, nuclear stain Hoechst 33258. Bars-30  $\mu\text{m}$  in (A–D).
